# Supplementary material
Source: Research Square preprint supplement (doi:10.21203/rs.3.rs-9008638/v1)

Fig.S2E

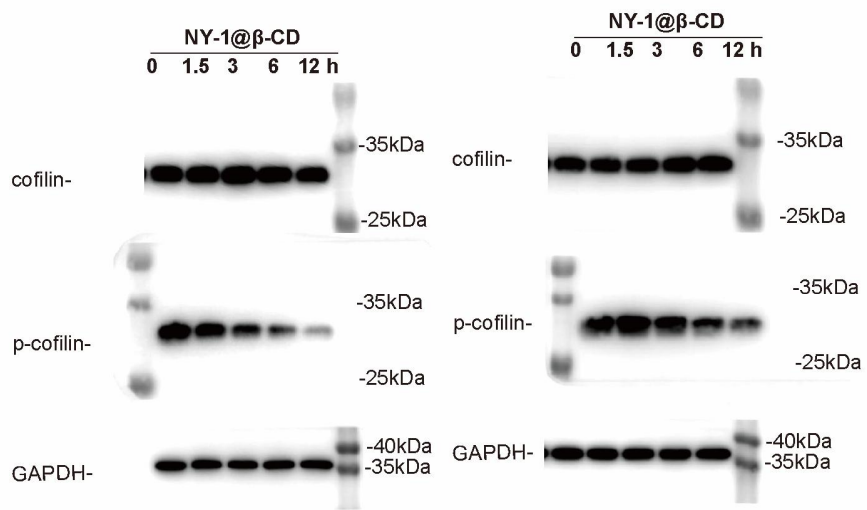

Fig.3O

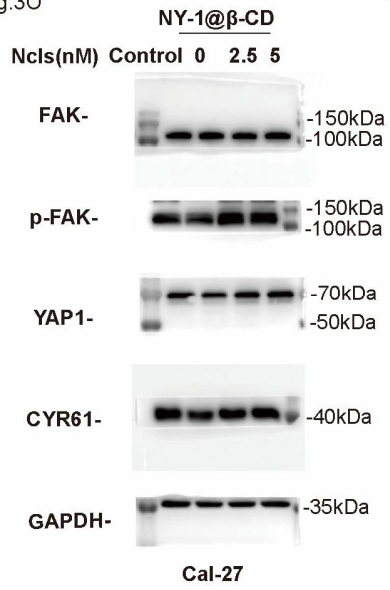

Fig.3P

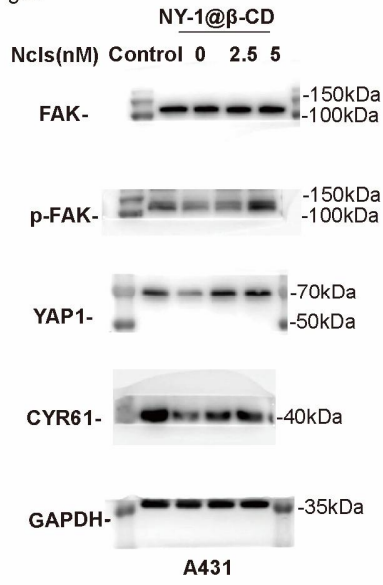

Fig.S3C

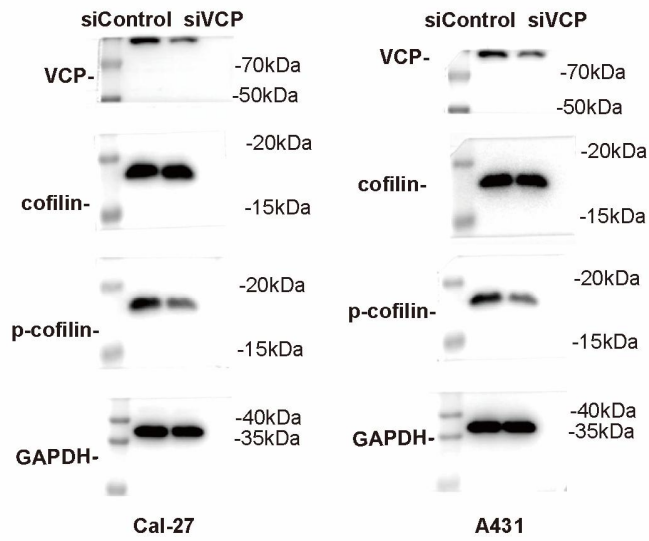

Fig.3E

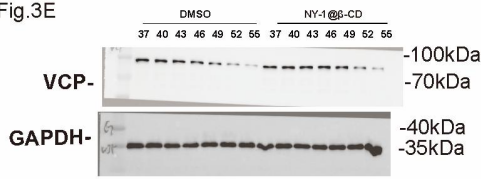

Fig.3F

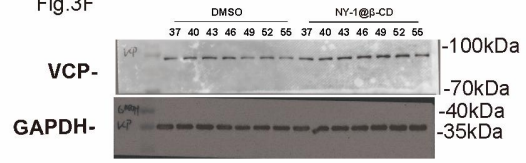

Fig.3K

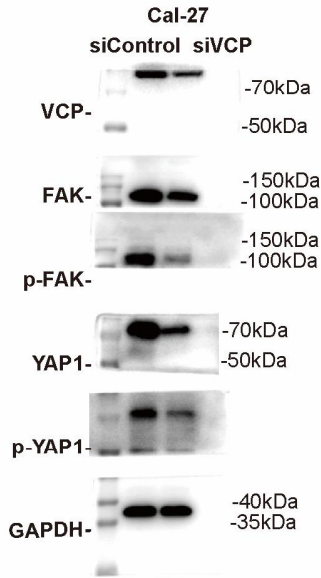

Fig.3L

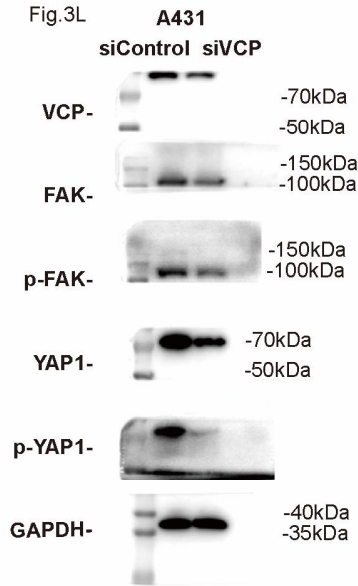

Fig.3M

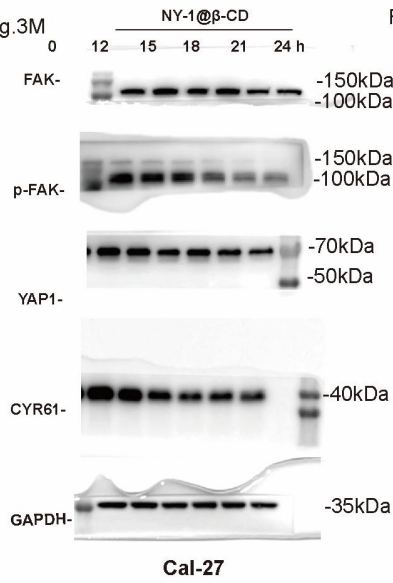

Fig.3N

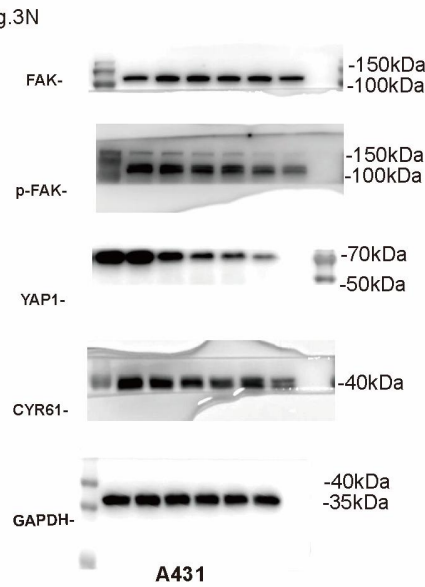

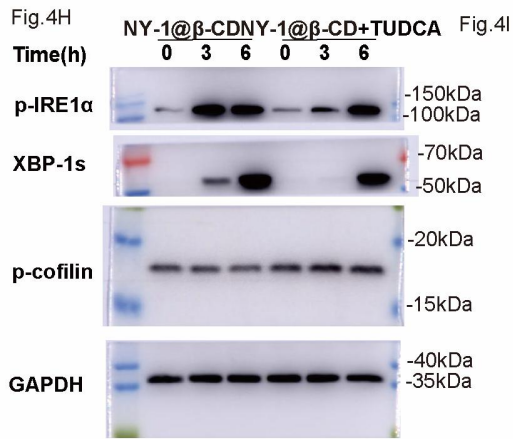

Fig.4L

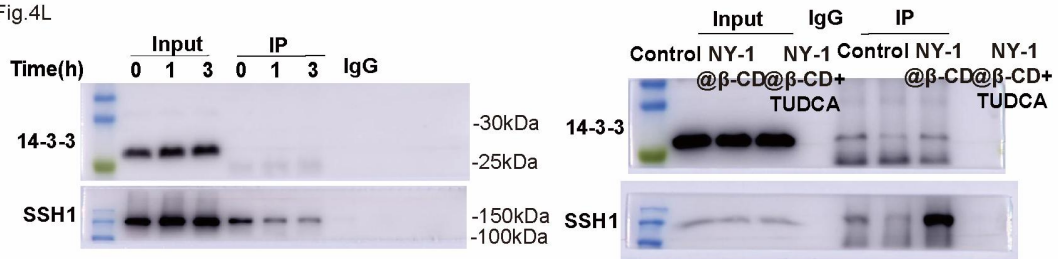

Fig.4K

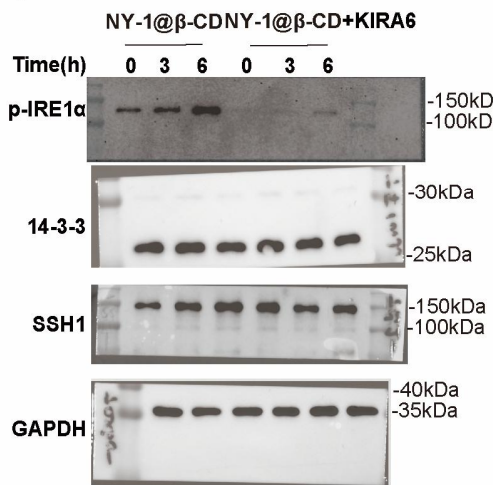

Fig.S4B

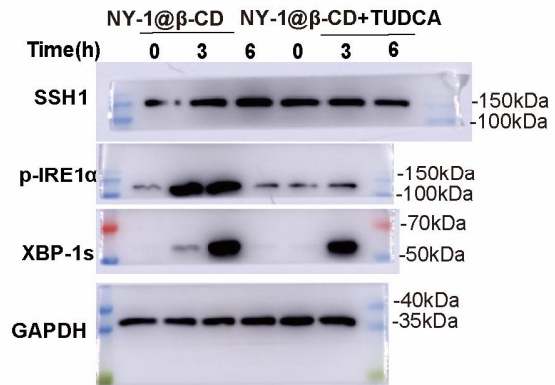

Supplement: Supplementary file 1 [file ec1d02d6d0bb8b937851ee8a.pdf]
